# Supplementary material for: Geographical Indication Characteristics of Aroma and Phenolic Acids of the Changping Strawberry
Source: MDPI journal article supplement (doi:10.3390/foods12213889), 2023-10-24
Supplement: s1 [file s1]

**Table S1.** Aroma composition and relative content in strawberries from different groups.

| No. | Compound Name and Class               | Relative content (%) |       |       |       |       |       |
|-----|---------------------------------------|----------------------|-------|-------|-------|-------|-------|
|     |                                       | GI                   | CP    | PG    | MY    | SY    | TZ    |
|     | Furanones                             | 2.05                 | 3.11  | 2.44  | 3.03  | 2.15  | 3.16  |
| 1   | 2-Methyl furan                        | 0.02                 | 0.01  | 0.01  | 0.03  | 0.02  | 0.01  |
| 2   | 2-Ethyl furan                         | 0.10                 | 0.10  | 0.14  | 0.23  | 0.19  | 0.14  |
| 3   | 2-Penty lfuran                        | 1.35                 | 1.77  | 1.84  | 2.56  | 1.71  | 2.46  |
| 4   | 2,5-Dimethyl-4-methoxy-3(2H)-furanone | 0.48                 | 1.07  | 0.37  | 0.15  | 0.17  | 0.38  |
| 5   | Furaneol                              | 0.11                 | 0.16  | 0.08  | 0.06  | 0.07  | 0.17  |
|     | Lactones                              | 0.35                 | 0.60  | 0.21  | 0.15  | 0.19  | 0.40  |
| 6   | $\gamma$ -Caprolactone                | 0.03                 | 0.04  | 0.03  | 0.02  | 0.03  | 0.03  |
| 7   | (E)-Whiskey lactone                   | 0.02                 | 0.05  | 0.02  | 0.00  | 0.00  | 0.01  |
| 8   | $\gamma$ -Octalactone                 | 0.04                 | 0.04  | 0.02  | 0.02  | 0.02  | 0.02  |
| 9   | (Z)-whiskey lactone                   | 0.04                 | 0.14  | 0.03  | 0.02  | 0.03  | 0.05  |
| 10  | $\gamma$ -Decanolactone               | 0.04                 | 0.04  | 0.02  | 0.01  | 0.02  | 0.04  |
| 11  | $\gamma$ -Dodecalactone               | 0.19                 | 0.30  | 0.09  | 0.07  | 0.10  | 0.25  |
|     | Esters                                | 49.95                | 49.29 | 46.04 | 39.88 | 35.45 | 46.03 |
| 12  | Ethy lacetate                         | 0.54                 | 1.58  | 0.85  | 0.43  | 0.80  | 1.55  |
| 13  | Methyl isobutyrate                    | 0.02                 | 0.02  | 0.02  | 0.01  | 0.01  | 0.01  |
| 14  | Ethyl propionate                      | 0.01                 | 0.08  | 0.02  | 0.01  | 0.01  | 0.05  |
| 15  | Ethyl isobutyrate                     | 0.00                 | 0.01  | 0.00  | 0.00  | 0.00  | 0.01  |
| 16  | Propyl acetate                        | 0.01                 | 0.01  | 0.03  | 0.01  | 0.02  | 0.03  |
| 17  | Methyl butyrate                       | 9.55                 | 7.55  | 8.62  | 9.83  | 9.68  | 9.19  |

|    |                            |      |      |      |      |      |      |
|----|----------------------------|------|------|------|------|------|------|
| 18 | Methyl DL-2-Methylbutyrate | 0.64 | 0.61 | 0.58 | 0.47 | 0.33 | 0.57 |
| 19 | Methyl isovalerate         | 4.07 | 2.36 | 3.43 | 3.43 | 1.94 | 1.37 |
| 20 | Ethyl butyrate             | 6.78 | 7.19 | 5.87 | 5.00 | 5.03 | 7.36 |
| 21 | Isopropyl butyrate         | 4.01 | 4.00 | 2.96 | 2.45 | 1.93 | 2.30 |
| 22 | Ethyl 2-methylbutyrate     | 0.18 | 0.55 | 0.19 | 0.13 | 0.10 | 0.61 |
| 23 | Ethyl isovalerate          | 1.14 | 3.82 | 0.95 | 0.38 | 0.30 | 1.82 |
| 24 | Butyl acetate              | 0.32 | 0.41 | 0.22 | 0.10 | 0.09 | 0.25 |
| 25 | 2-Methyl-1-butanol acetate | 2.65 | 2.18 | 3.35 | 2.00 | 1.49 | 1.82 |
| 26 | Isoamyl acetate            | 2.99 | 2.41 | 3.68 | 2.24 | 1.67 | 2.05 |
| 27 | Propyl butyrate            | 0.20 | 0.43 | 0.21 | 0.10 | 0.11 | 0.23 |
| 28 | Ethyl valerate             | 0.10 | 0.48 | 0.04 | 0.03 | 0.03 | 0.14 |
| 29 | Amyl acetate               | 0.19 | 0.21 | 0.29 | 0.37 | 0.17 | 0.28 |
| 30 | Methyl hexanoate           | 7.70 | 6.02 | 7.05 | 8.02 | 8.24 | 7.38 |
| 31 | Ethyl hexanoate            | 4.62 | 5.41 | 3.82 | 2.22 | 1.53 | 5.61 |
| 32 | Isoamyl butyrate           | 1.36 | 0.45 | 0.24 | 0.10 | 0.07 | 0.18 |
| 33 | Hexyl acetate              | 0.44 | 0.35 | 0.58 | 0.71 | 0.37 | 0.80 |
| 34 | Amyl butyrate              | 0.00 | 0.10 | 0.00 | 0.00 | 0.00 | 0.00 |
| 35 | cis-3-Hexenyl acetate      | 0.33 | 0.24 | 0.50 | 0.57 | 0.32 | 0.41 |
| 36 | Propyl hexanoate           | 0.01 | 0.03 | 0.01 | 0.00 | 0.00 | 0.01 |
| 37 | 2-Ethyl hexyl acetate      | 0.04 | 0.06 | 0.02 | 0.02 | 0.00 | 0.02 |
| 38 | Methyl octanoate           | 0.74 | 0.51 | 1.07 | 0.38 | 0.51 | 0.47 |
| 39 | Methyl(methylthio)acetate  | 0.01 | 0.00 | 0.01 | 0.01 | 0.00 | 0.02 |
| 40 | Butyl hexanoate            | 0.04 | 0.08 | 0.01 | 0.00 | 0.00 | 0.02 |
| 41 | Ethyl octanoate            | 0.11 | 0.48 | 0.14 | 0.04 | 0.04 | 0.31 |
| 42 | Isoamyl hexanoate          | 0.06 | 0.11 | 0.04 | 0.02 | 0.01 | 0.03 |
| 43 | Nonyl acetate              | 0.00 | 0.01 | 0.00 | 0.00 | 0.00 | 0.01 |

|    |                                              |       |       |       |       |       |       |
|----|----------------------------------------------|-------|-------|-------|-------|-------|-------|
| 44 | Hexyl hexanoate                              | 0.04  | 0.05  | 0.04  | 0.04  | 0.02  | 0.06  |
| 45 | Methyl benzoate                              | 0.23  | 0.17  | 0.24  | 0.33  | 0.25  | 0.21  |
| 46 | Ethyl decanoate                              | 0.00  | 0.04  | 0.00  | 0.00  | 0.00  | 0.02  |
| 47 | Isopropyl benzoate                           | 0.03  | 0.02  | 0.03  | 0.03  | 0.02  | 0.02  |
| 48 | Ethyl benzoate                               | 0.06  | 0.07  | 0.06  | 0.04  | 0.03  | 0.09  |
| 49 | Benzyl acetate                               | 0.07  | 0.07  | 0.08  | 0.03  | 0.02  | 0.11  |
| 50 | Birch-Me                                     | 0.36  | 0.71  | 0.50  | 0.19  | 0.18  | 0.24  |
| 51 | (2Z)-3,7-dimethyl-2,6-octadien-1-yl butyrate | 0.00  | 0.01  | 0.02  | 0.03  | 0.02  | 0.02  |
| 52 | Methyl cinnamate                             | 0.06  | 0.05  | 0.03  | 0.04  | 0.04  | 0.05  |
| 53 | Ethyl cinnamate                              | 0.11  | 0.16  | 0.03  | 0.05  | 0.03  | 0.10  |
| 54 | Methyl anthranilate                          | 0.13  | 0.22  | 0.22  | 0.06  | 0.05  | 0.20  |
|    | Aldehydes                                    | 22.93 | 18.78 | 17.23 | 25.86 | 26.87 | 22.78 |
| 55 | Butyraldehyde                                | 0.05  | 0.03  | 0.04  | 0.07  | 0.07  | 0.05  |
| 56 | Caproaldehyde                                | 8.41  | 6.87  | 7.33  | 10.37 | 10.50 | 8.75  |
| 57 | trans-2-Pentenal                             | 0.43  | 0.33  | 0.22  | 0.71  | 0.65  | 0.43  |
| 58 | trans-2-Hexen-1-al                           | 8.24  | 6.23  | 6.59  | 9.56  | 9.78  | 7.64  |
| 59 | Octanal                                      | 0.19  | 0.16  | 0.08  | 0.15  | 0.20  | 0.17  |
| 60 | trans-2-Heptenal                             | 1.19  | 0.85  | 0.54  | 1.16  | 1.58  | 1.09  |
| 61 | Melonal                                      | 0.00  | 0.00  | 0.07  | 0.00  | 0.00  | 0.00  |
| 62 | Nonanal                                      | 0.41  | 0.30  | 0.22  | 0.28  | 0.33  | 0.31  |
| 63 | 2,4-Hexadienal                               | 0.08  | 0.06  | 0.05  | 0.06  | 0.08  | 0.07  |
| 64 | (E)-2-Octenal                                | 0.88  | 0.72  | 0.44  | 0.85  | 0.92  | 1.00  |
| 65 | Benzaldehyde                                 | 2.21  | 2.42  | 0.92  | 1.87  | 1.79  | 2.21  |
| 66 | trans-Cinnamaldehyde                         | 0.08  | 0.07  | 0.19  | 0.09  | 0.12  | 0.08  |
| 67 | trans-2-Nonenal                              | 0.14  | 0.13  | 0.15  | 0.10  | 0.13  | 0.21  |
| 68 | trans,trans-2,4-Heptandienal                 | 0.12  | 0.12  | 0.08  | 0.18  | 0.19  | 0.14  |

|    |                                   |      |      |       |       |       |      |
|----|-----------------------------------|------|------|-------|-------|-------|------|
| 69 | trans,cis-2,6-Nonadienal          | 0.15 | 0.13 | 0.11  | 0.14  | 0.15  | 0.19 |
| 70 | (Z)-2-Decenal                     | 0.09 | 0.05 | 0.00  | 0.00  | 0.09  | 0.06 |
| 71 | trans-2-Decenal                   | 0.02 | 0.01 | 0.01  | 0.01  | 0.02  | 0.01 |
| 72 | trans,trans-2,4-Nonadienal        | 0.04 | 0.04 | 0.03  | 0.04  | 0.05  | 0.05 |
| 73 | trans-2,4-Decadienal              | 0.12 | 0.15 | 0.13  | 0.19  | 0.18  | 0.22 |
| 74 | Pentadecanal                      | 0.06 | 0.09 | 0.03  | 0.02  | 0.03  | 0.11 |
| 75 | Decanal                           | 0.02 | 0.02 | 0.01  | 0.02  | 0.02  | 0.02 |
|    | Ketones                           | 4.84 | 5.82 | 5.09  | 5.00  | 4.87  | 4.47 |
| 76 | 2-Butanone                        | 0.06 | 0.07 | 0.07  | 0.06  | 0.06  | 0.08 |
| 77 | 3-Methyl-2-butanone               | 0.01 | 0.01 | 0.02  | 0.02  | 0.01  | 0.01 |
| 78 | 2-Pentanone                       | 0.37 | 0.75 | 0.00  | 0.00  | 0.00  | 0.41 |
| 79 | 3-Pentanone                       | 0.00 | 0.00 | 0.89  | 0.65  | 0.19  | 0.00 |
| 80 | 2,3-Butanedione                   | 0.82 | 0.80 | 1.14  | 0.62  | 0.56  | 0.44 |
| 81 | 2-Methyl-3-pentanone              | 0.00 | 0.00 | 0.00  | 0.00  | 0.00  | 0.00 |
| 82 | 4-Methyl-2-pentanone              | 0.32 | 0.57 | 0.35  | 0.22  | 0.13  | 0.29 |
| 83 | Ethyl vinyl ketone                | 0.98 | 0.70 | 0.44  | 1.49  | 1.36  | 1.06 |
| 84 | 2-Heptanone                       | 0.89 | 1.85 | 1.00  | 0.49  | 0.47  | 0.80 |
| 85 | 3-Octanone                        | 0.17 | 0.16 | 0.24  | 0.25  | 0.26  | 0.21 |
| 86 | 2-Octanone                        | 0.00 | 0.01 | 0.01  | 0.01  | 0.01  | 0.01 |
| 87 | 1-Octen-3-one                     | 0.63 | 0.38 | 0.13  | 0.48  | 0.86  | 0.58 |
| 88 | Methyl heptenone                  | 0.48 | 0.37 | 0.38  | 0.55  | 0.70  | 0.46 |
| 89 | 3-Octen-2-one                     | 0.01 | 0.02 | 0.00  | 0.02  | 0.03  | 0.02 |
| 90 | 2-Methyl tetrahydrothiophen-3-one | 0.01 | 0.01 | 0.01  | 0.01  | 0.01  | 0.01 |
| 91 | Acetophenone                      | 0.09 | 0.11 | 0.42  | 0.12  | 0.20  | 0.10 |
|    | Alcohols                          | 3.25 | 2.53 | 14.34 | 11.44 | 11.55 | 4.61 |
| 92 | (±)-2-Pentanol                    | 0.01 | 0.01 | 0.00  | 0.00  | 0.00  | 0.00 |

|     |                        |       |       |       |       |       |       |
|-----|------------------------|-------|-------|-------|-------|-------|-------|
| 93  | n-Butanol              | 0.13  | 0.10  | 0.07  | 0.11  | 0.06  | 0.12  |
| 94  | (±)-2-Methyl-1-butanol | 0.09  | 0.08  | 0.09  | 0.10  | 0.12  | 0.11  |
| 95  | Isopentyl alcohol      | 0.41  | 0.28  | 0.33  | 0.52  | 0.50  | 0.32  |
| 96  | 1-Pentanol             | 0.64  | 0.43  | 1.36  | 1.03  | 1.27  | 0.70  |
| 97  | 2-Heptanol             | 0.10  | 0.15  | 0.06  | 0.04  | 0.03  | 0.07  |
| 98  | 1-Hexanol              | 0.94  | 0.77  | 6.36  | 5.32  | 5.78  | 2.18  |
| 99  | trans-3-Hexen-1-ol     | 0.01  | 0.00  | 0.13  | 0.06  | 0.05  | 0.02  |
| 100 | Leaf alcohol           | 0.03  | 0.02  | 0.08  | 0.11  | 0.07  | 0.04  |
| 101 | trans-2-Hexen-1-ol     | 0.36  | 0.23  | 4.49  | 3.44  | 2.72  | 0.49  |
| 102 | cis-2-Hexen-1-ol       | 0.00  | 0.00  | 0.03  | 0.00  | 0.00  | 0.00  |
| 103 | 1-Octen-3-ol           | 0.15  | 0.10  | 0.20  | 0.17  | 0.24  | 0.15  |
| 104 | 1-Heptanol             | 0.11  | 0.08  | 0.29  | 0.12  | 0.17  | 0.10  |
| 105 | 2-Ethyl-1-hexanol      | 0.07  | 0.06  | 0.06  | 0.08  | 0.08  | 0.07  |
| 106 | n-Octanol              | 0.11  | 0.10  | 0.34  | 0.15  | 0.18  | 0.10  |
| 107 | trans-2-Octen-1-ol     | 0.00  | 0.02  | 0.05  | 0.04  | 0.04  | 0.03  |
| 108 | 1-Nonanol              | 0.07  | 0.07  | 0.14  | 0.12  | 0.13  | 0.09  |
| 109 | Benzyl alcohol         | 0.03  | 0.03  | 0.08  | 0.04  | 0.05  | 0.04  |
| 110 | Chnnamyl alcohol       | 0.00  | 0.00  | 0.18  | 0.00  | 0.06  | 0.00  |
|     | Acids                  | 11.09 | 14.85 | 10.26 | 10.26 | 14.21 | 11.87 |
| 111 | Isobutyric acid        | 0.42  | 0.74  | 0.39  | 0.36  | 0.51  | 0.39  |
| 112 | Butyric acid           | 1.07  | 2.59  | 0.90  | 0.64  | 1.01  | 0.93  |
| 113 | 2-Methylbutyric acid   | 1.32  | 2.65  | 1.41  | 1.23  | 1.49  | 1.70  |
| 114 | Valeric acid           | 0.20  | 0.22  | 0.15  | 0.21  | 0.46  | 0.29  |
| 115 | Hexanoic acid          | 7.03  | 7.16  | 6.14  | 6.80  | 8.51  | 6.73  |
| 116 | 5-Methylhexanoic acid  | 0.00  | 0.03  | 0.00  | 0.00  | 0.00  | 0.00  |
| 117 | trans-2-Hexenoic acid  | 0.06  | 0.06  | 0.09  | 0.10  | 0.14  | 0.08  |

|     |                           |      |      |      |      |      |      |
|-----|---------------------------|------|------|------|------|------|------|
| 118 | n-Octanoic acid           | 0.23 | 0.51 | 0.29 | 0.17 | 0.43 | 0.40 |
| 119 | Nonoic acid               | 0.73 | 0.85 | 0.83 | 0.71 | 1.59 | 1.29 |
| 120 | Capric acid               | 0.04 | 0.05 | 0.05 | 0.04 | 0.07 | 0.06 |
|     | Terpenoids                | 5.41 | 4.91 | 4.23 | 4.23 | 4.34 | 6.34 |
| 121 | Camphene                  | 0.00 | 0.00 | 0.00 | 0.01 | 0.01 | 0.00 |
| 122 | 3-Carene                  | 0.00 | 0.00 | 0.00 | 0.00 | 0.00 | 0.00 |
| 123 | Myrcene                   | 0.05 | 0.00 | 0.05 | 0.05 | 0.05 | 0.06 |
| 124 | Cinene                    | 0.01 | 0.01 | 0.01 | 0.01 | 0.02 | 0.01 |
| 125 | Eucalyptol                | 0.00 | 0.00 | 0.00 | 0.00 | 0.00 | 0.00 |
| 126 | (Z)- $\beta$ -ocimene     | 0.02 | 0.02 | 0.02 | 0.02 | 0.02 | 0.02 |
| 127 | trans- $\beta$ -Ocimene   | 0.02 | 0.02 | 0.03 | 0.02 | 0.02 | 0.03 |
| 128 | Terpinolene               | 0.01 | 0.01 | 0.01 | 0.01 | 0.01 | 0.01 |
| 129 | ( $\pm$ )-Camphor         | 0.02 | 0.01 | 0.02 | 0.03 | 0.03 | 0.03 |
| 130 | Linalool                  | 3.83 | 3.06 | 3.30 | 3.40 | 3.23 | 3.79 |
| 131 | trans- $\beta$ -Farnesene | 0.06 | 0.08 | 0.03 | 0.02 | 0.04 | 0.12 |
| 132 | Linalyl butyrate          | 0.02 | 0.07 | 0.00 | 0.00 | 0.00 | 0.02 |
| 133 | alpha-Terpineol           | 0.01 | 0.02 | 0.02 | 0.02 | 0.01 | 0.01 |
| 134 | $\beta$ -Citronellol      | 0.04 | 0.03 | 0.02 | 0.03 | 0.04 | 0.03 |
| 135 | Geranyl acetone           | 0.05 | 0.03 | 0.03 | 0.06 | 0.07 | 0.05 |
| 136 | $\beta$ -Ionone           | 0.02 | 0.02 | 0.02 | 0.04 | 0.04 | 0.03 |
| 137 | Nerolidol                 | 0.99 | 1.39 | 0.49 | 0.32 | 0.54 | 1.94 |
| 138 | $\alpha$ -Pinene          | 0.00 | 0.00 | 0.00 | 0.00 | 0.00 | 0.00 |
| 139 | cis-Linalool oxide        | 0.05 | 0.02 | 0.04 | 0.04 | 0.04 | 0.03 |
| 140 | (E)-Linalool oxide        | 0.14 | 0.07 | 0.09 | 0.09 | 0.13 | 0.10 |
| 141 | Methyl disulfide          | 0.01 | 0.01 | 0.03 | 0.02 | 0.03 | 0.02 |
|     | Others                    | 0.13 | 0.11 | 0.16 | 0.15 | 0.38 | 0.33 |

|     |                      |      |      |      |      |      |      |
|-----|----------------------|------|------|------|------|------|------|
| 142 | Phellandrene         | 0.06 | 0.05 | 0.05 | 0.05 | 0.05 | 0.06 |
| 143 | Pyridine             | 0.00 | 0.00 | 0.00 | 0.00 | 0.20 | 0.21 |
| 144 | 2-Ethyl pyridine     | 0.01 | 0.01 | 0.01 | 0.01 | 0.01 | 0.01 |
| 145 | Dimethyl trisulfide  | 0.01 | 0.01 | 0.03 | 0.02 | 0.03 | 0.01 |
| 146 | 4-Isopropenyltoluene | 0.06 | 0.05 | 0.06 | 0.07 | 0.08 | 0.06 |
| 147 | Benzothiazole        | 0.03 | 0.03 | 0.03 | 0.03 | 0.04 | 0.03 |

---

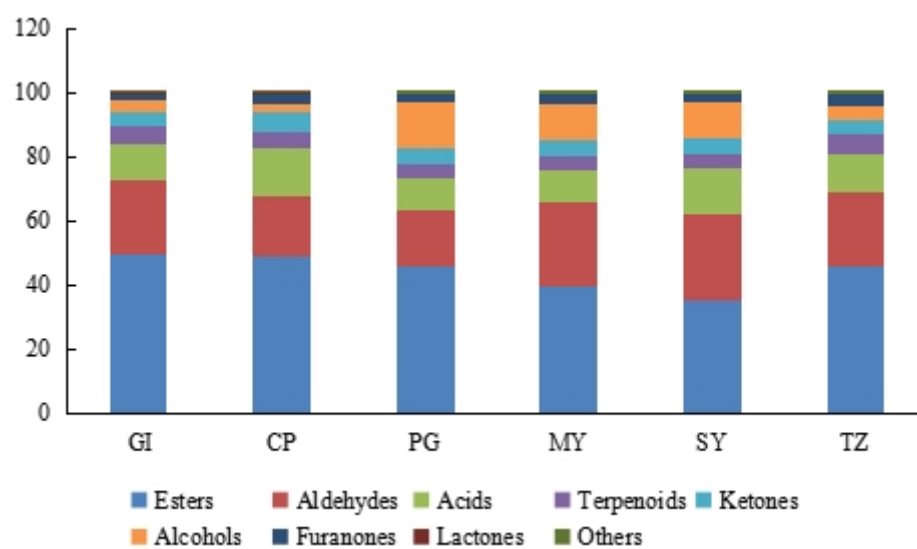

**Figure S1.** Schematic diagram representing the volatile compound abundance in the major chemical classes detected in strawberry fruits from different groups



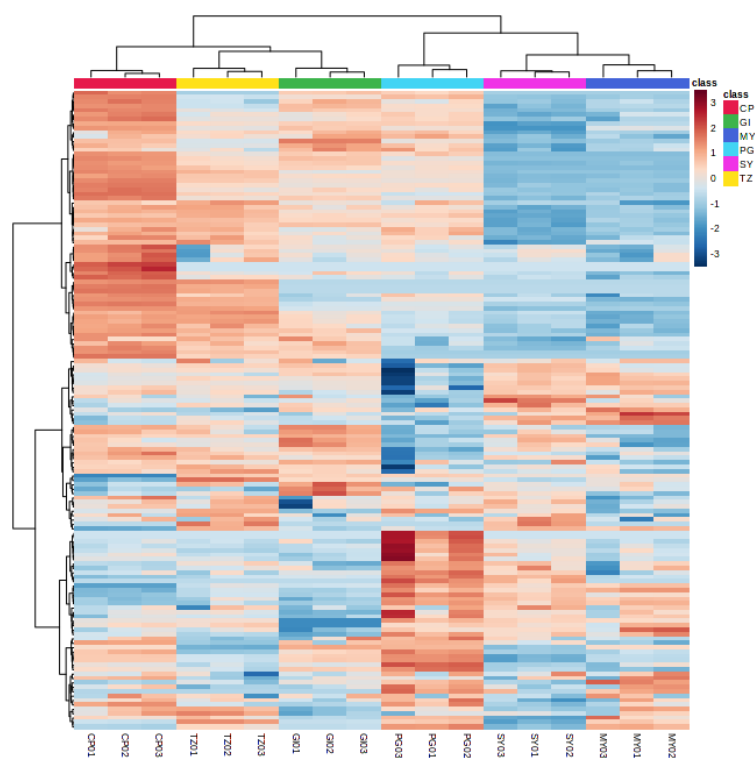

**Figure S2.** Cluster heat map of strawberry samples on the basis of volatile compounds

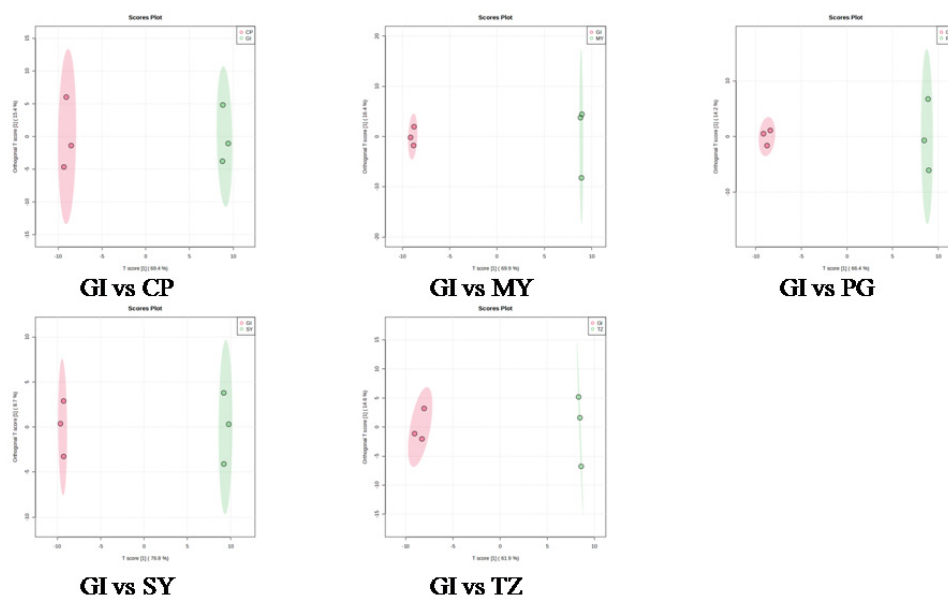

**Figure S3.** OPLS-DA score plots of strawberry samples between GI group and other groups on the basis of volatile compounds

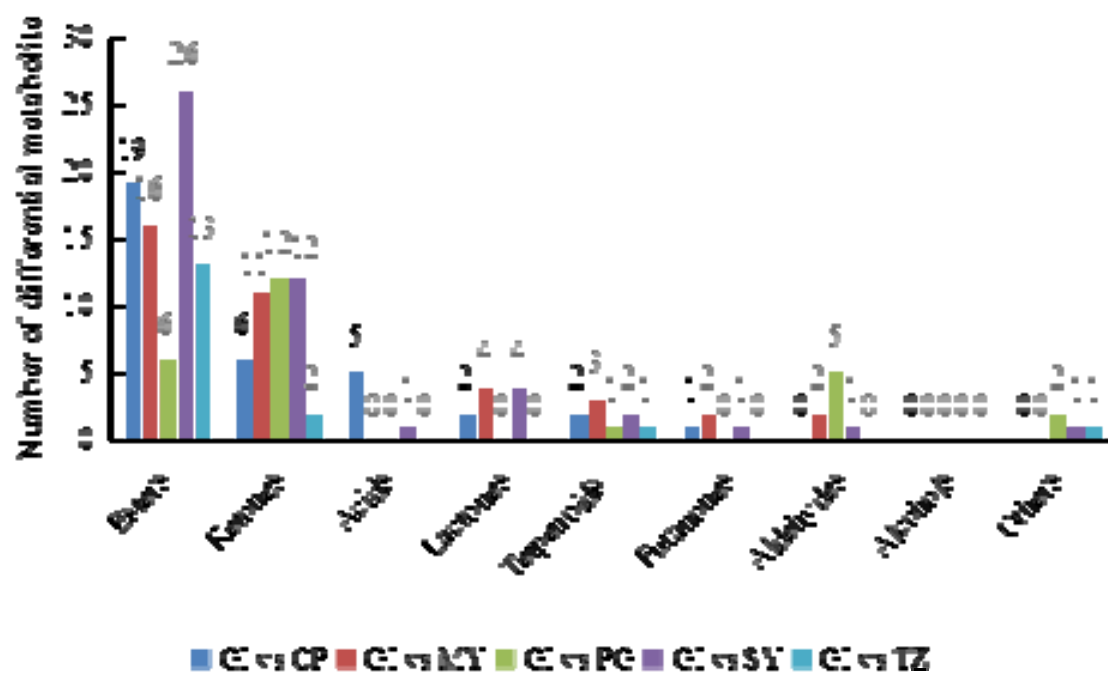

Figure S4. Differential volatile compounds in the major chemical classes detected in strawberry samples from different groups

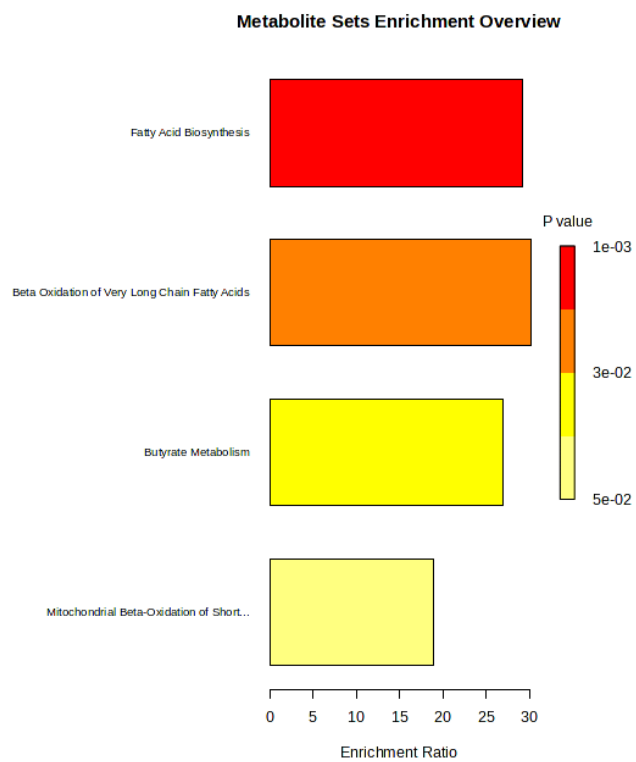

**Figure S5.** KEGG barplots of GI versus CP

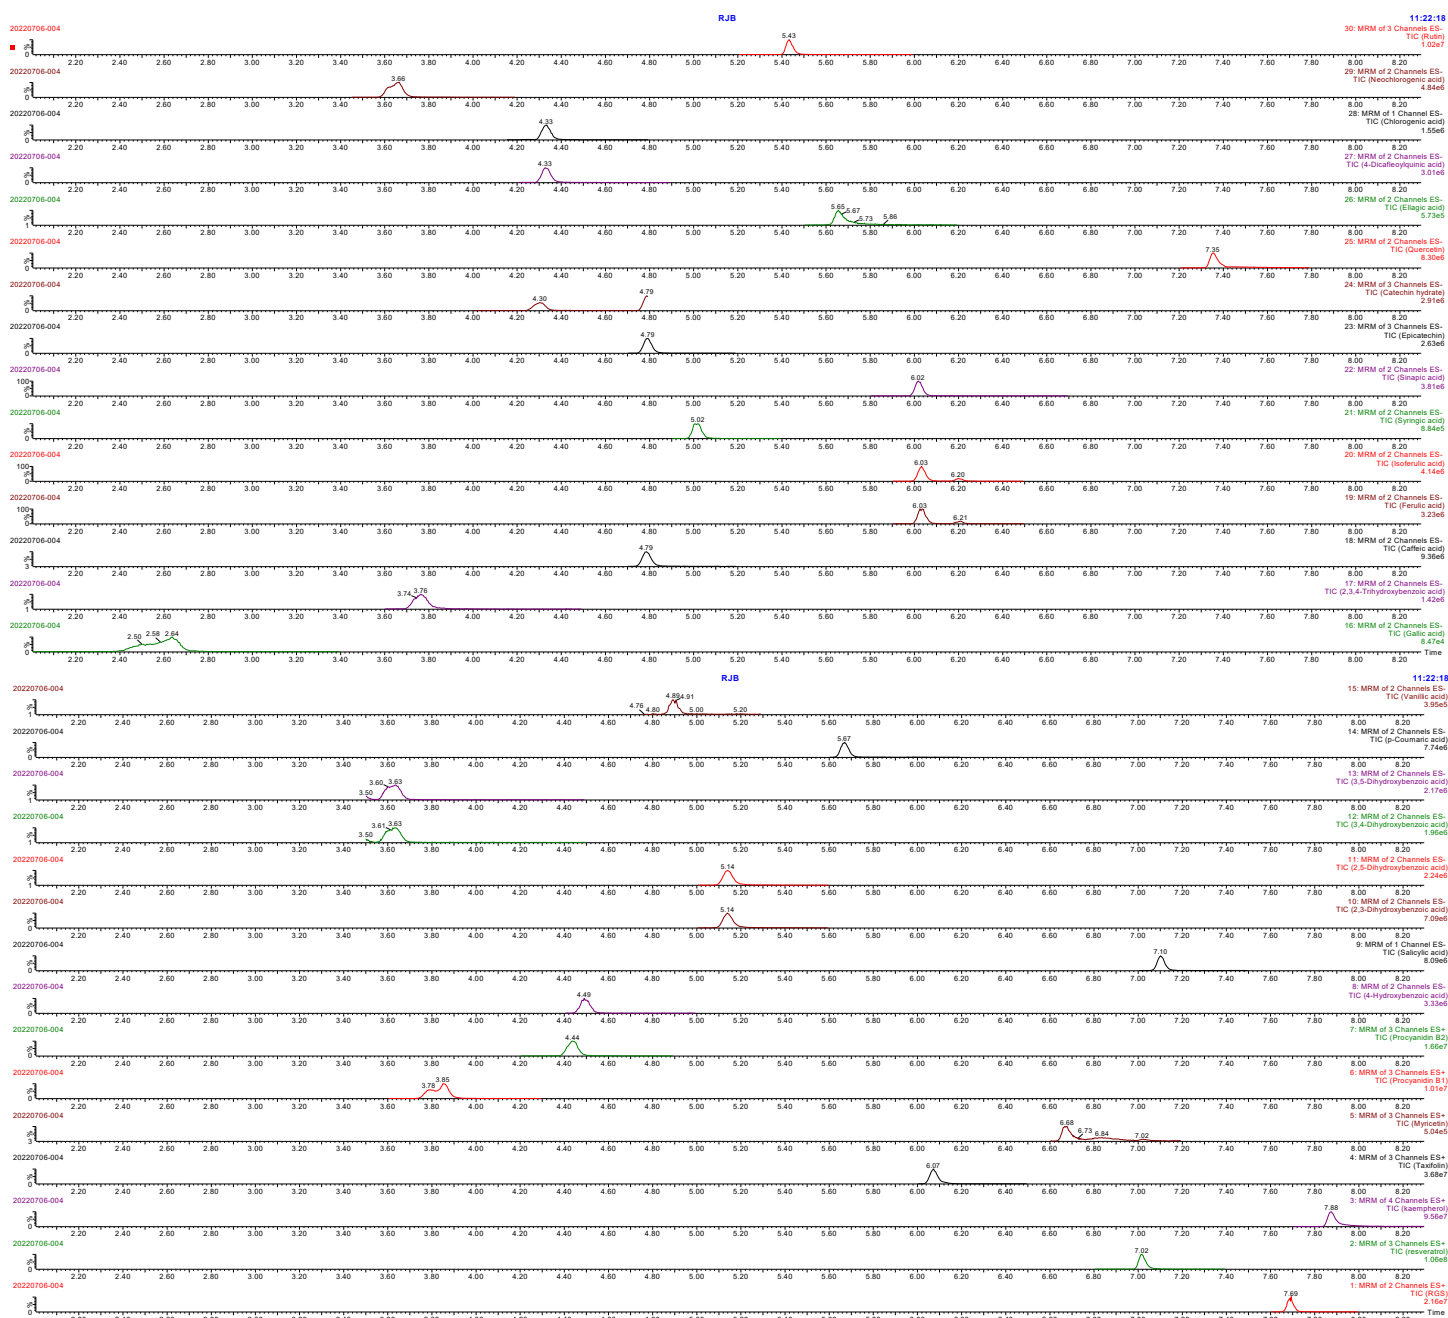

Figure S6. Chromatograms of 30 kinds of phenolic acids

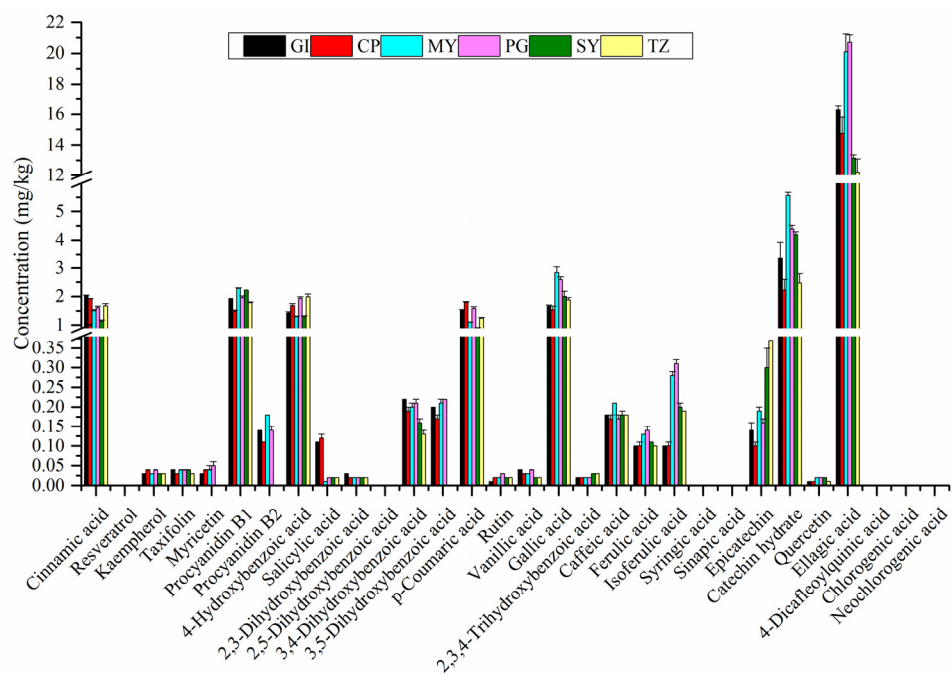

**Figure S7.** Contents of phenolic acids (mg/kg FW  $\pm$  RSD (n = 3)) in strawberry samples from six groups

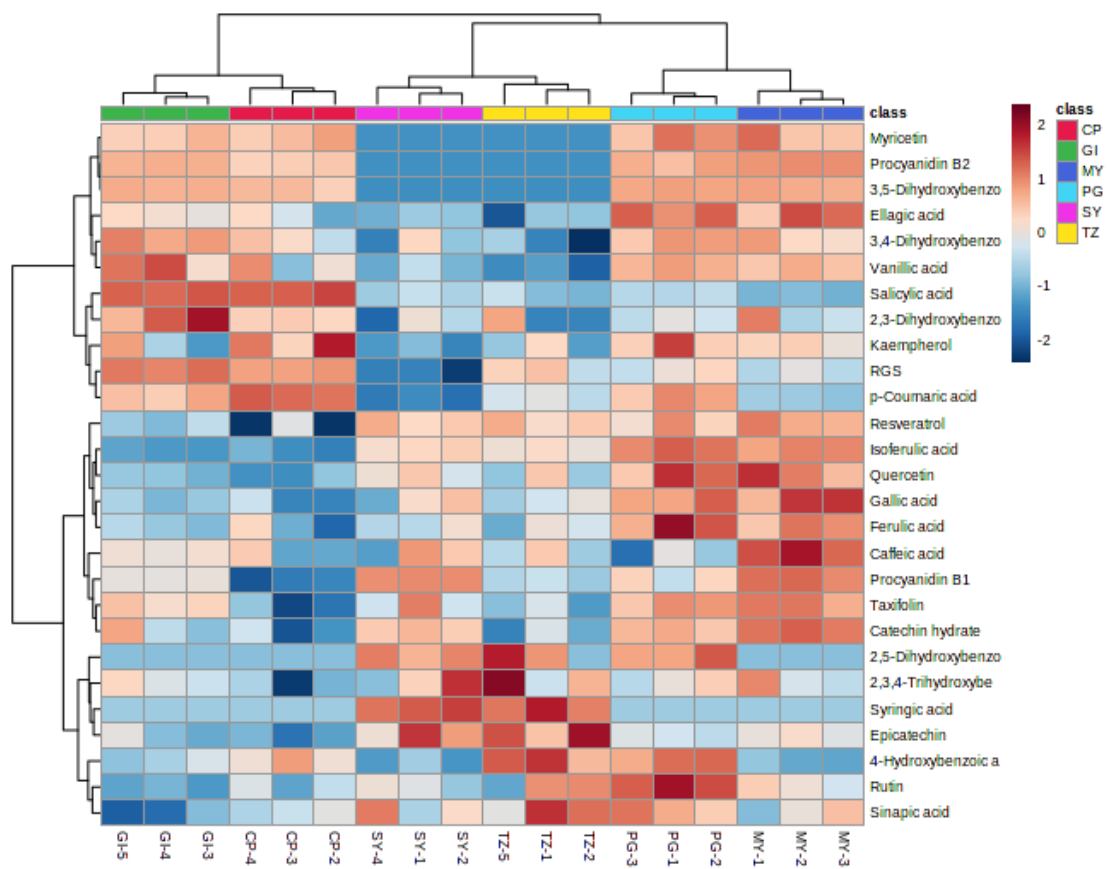

**Figure S8.** Cluster heat map of strawberry samples on the basis of phenolic acids

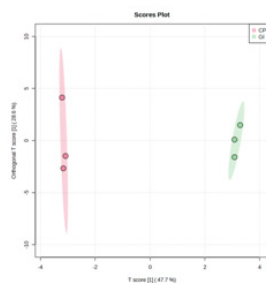

**GI vs CP**

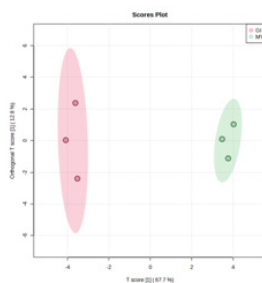

**GI vs MY**

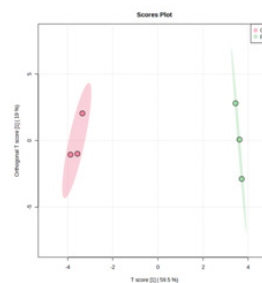

**GI vs PG**

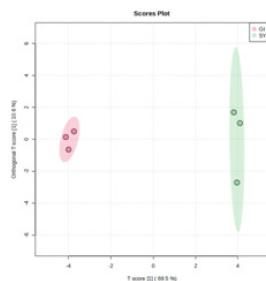

**GI vs SY**

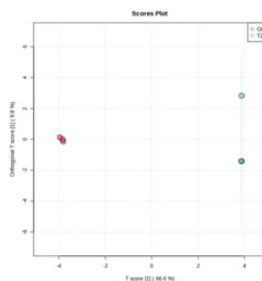

**GI vs TZ**

**Figure S9.** OPLS-DA score plots of strawberry samples between GI group and other groups on the basis of phenolic acids
